# Supplementary material
Source: PubMed Central journal article supplement (PMC4310620)
Supplement: bi501388y_si_003.pdf [file bi501388y_si_003.pdf]

## **Supporting Information for Publication**

### **Experimental Strategies for Functional Annotation and Metabolism Discovery: Targeted Screening of Solute Binding Proteins and Unbiased Panning of Metabolomes**

\*Matthew W. Vetting<sup>1,10</sup>, Nawar Al-Obaidi<sup>1,10</sup>, Suwen Zhao<sup>2,10</sup>, Brian San Francisco<sup>3,10</sup>,  
Jungwook Kim<sup>1</sup>, Daniel J. Wichelecki<sup>3,4</sup>, Jason T. Bouvier<sup>3,4</sup>, Jose O. Solbiati<sup>3</sup>, Hoan Vu<sup>6</sup>,  
Xinshuai Zhang<sup>3</sup>, Dmitry A. Rodionov<sup>7,8</sup>, James D. Love<sup>1</sup>, Brandan S. Hillerich<sup>1</sup>, Ronald D.  
Seidel<sup>1</sup>, \*Ronald J. Quinn<sup>6</sup>, \*Andrei L. Osterman<sup>7</sup>, \*John E. Cronan<sup>4,9</sup>, \*Matthew P. Jacobson<sup>2</sup>,  
\*John A. Gerlt<sup>3,4,5</sup>, \*Steven C. Almo<sup>1</sup>

**Table S1. Primers used in this study.**

| Purpose  | Primer name          | Primer sequence (5' to 3')                     |
|----------|----------------------|------------------------------------------------|
| qRT-PCR  | LysR RTPCR_FOR       | CAAGGAAGATGCCGTGGATC                           |
| qRT-PCR  | LysR RTPCR_REV       | ATAAAGCGCCATATCGACCAGT                         |
| qRT-PCR  | DctP RTPCR_FOR       | ATCAGCAGTCCGGAGGATTTTC                         |
| qRT-PCR  | DctP RTPCR_REV       | GTCAGATACTTCTGCACCTCG                          |
| qRT-PCR  | DctQ RTPCR_FOR       | CCGATCTGGAGCGATGAACT                           |
| qRT-PCR  | DctQ RTPCR_REV       | CGTATTGCCAACTCCACCAG                           |
| qRT-PCR  | DctM RTPCR_FOR       | CTTTACGTGGCGCTGTGTG                            |
| qRT-PCR  | DctM RTPCR_REV       | GACCGGTGATGCAATGAAGG                           |
| qRT-PCR  | VanX RTPCR_FOR       | GAAATGGTGGAAACACGCTATG                         |
| qRT-PCR  | VanX RTPCR_REV       | GCTCGAAATGCACGGTATGC                           |
| Knockout | VanX_KO_H_FOR        | CCGGCATCGTGCTGGAATTCGTACGCCCCACC               |
| Knockout | VanX_KO_Hext_REV     | CATCCCTCCAGTCCGGCGGTTTCGTTTCCAGCAAGC           |
| Knockout | VanX_KO_Bext_FOR     | GCTTGCTGGAAACGAACCGCCGGACTGGAGGGATG            |
| Knockout | VanX_KO_B_REV        | GTCGCGCCTGCCGGATCCTGTCTGCGCC                   |
| Knockout | DctP_KO_H_FOR        | GGATCTGGCCCTGCTGAATTCGCCTCCCGATGATC            |
| Knockout | DctP_KO_Hext_REV     | CCTCAAGGAAGTGAAGGAAGAAAACCGGATGTCTCCTTGTGTTATG |
| Knockout | DctP_KO_Bext_FOR     | CATAACAACAAGGAGACATCCGGTTTTCTCCTTCACTTCCTTGAGG |
| Knockout | DctP_KO_B_REV        | CCCCAGCAGGGGATCCACCAGCAAGGCGG                  |
| qRT-PCR  | Csal0675_left        | CACGCGTCGTACCATATTTCC                          |
| qRT-PCR  | Csal0675_right       | CGATTGCAGTCGTAGACCAG                           |
| qRT-PCR  | Csal0676_left        | GAGCCGTTCGACTTCCTCTT                           |
| qRT-PCR  | Csal0676_right       | ATCAGCAGCACACCGGAGAC                           |
| qRT-PCR  | Csal0677_left        | CATCGAGGGCCTGTTTACC                            |
| qRT-PCR  | Csal0677_right       | TCGTGTAGAGAACGCCATACC                          |
| qRT-PCR  | Csal0678_left        | GGCATCACCGAGGACTACAC                           |
| qRT-PCR  | Csal0678_right       | TCACAGCACACCTCGAACA                            |
| qRT-PCR  | Csal0679_left        | TCCAGACCACCAAGGAAGAG                           |
| qRT-PCR  | Csal0679_right       | GTAATCCGCCGTATCGAGTG                           |
| qRT-PCR  | Csal0680_left        | CGATGAATGACGAACTGGTG                           |
| qRT-PCR  | Csal0680_right       | GCGCTTGATGTAGCGTTTG                            |
| qRT-PCR  | Csal0681_left        | GTGATCTGTGATCCCGAACTG                          |
| qRT-PCR  | Csal0681_right       | GCGTGGCAGATATTCCTTGA                           |
| qRT-PCR  | Csal16s_left         | AAGAAGCACCGGCTAACTCC                           |
| qRT-PCR  | Csal16s_right        | TCCCGATCTCTACGCATTTT                           |
| Knockout | Csal0678_EcoRI_Fwd   | CTGCTCGAATTCGTACGACAAGATCATGGTC                |
| Knockout | Csal0678_HindIII_Rev | CTGCAAGCTTGACTGGTGGATATGACTGG                  |
| Knockout | Csal0679_EcoRI_Fwd   | CACAGAATTCAAGGAAATCTGGGAAGAGGAGTAC             |
| Knockout | Csal0679_HindIII_Rev | CAATAAGCTTTCAACAGTACGCTGTTGCCTG                |
| qRT-PCR  | LysR RTPCR_FOR       | CAAGGAAGATGCCGTGGATC                           |
| qRT-PCR  | LysR RTPCR_REV       | ATAAAGCGCCATATCGACCAGT                         |
| qRT-PCR  | DctP RTPCR_FOR       | ATCAGCAGTCCGGAGGATTTTC                         |
| qRT-PCR  | DctP RTPCR_REV       | GTCAGATACTTCTGCACCTCG                          |
| qRT-PCR  | DctQ RTPCR_FOR       | CCGATCTGGAGCGATGAACT                           |
| qRT-PCR  | DctQ RTPCR_REV       | CGTATTGCCAACTCCACCAG                           |
| qRT-PCR  | DctM RTPCR_FOR       | CTTTACGTGGCGCTGTGTG                            |
| qRT-PCR  | DctM RTPCR_REV       | GACCGGTGATGCAATGAAGG                           |
| qRT-PCR  | VanX RTPCR_FOR       | GAAATGGTGGAAACACGCTATG                         |
| qRT-PCR  | VanX RTPCR_REV       | GCTCGAAATGCACGGTATGC                           |

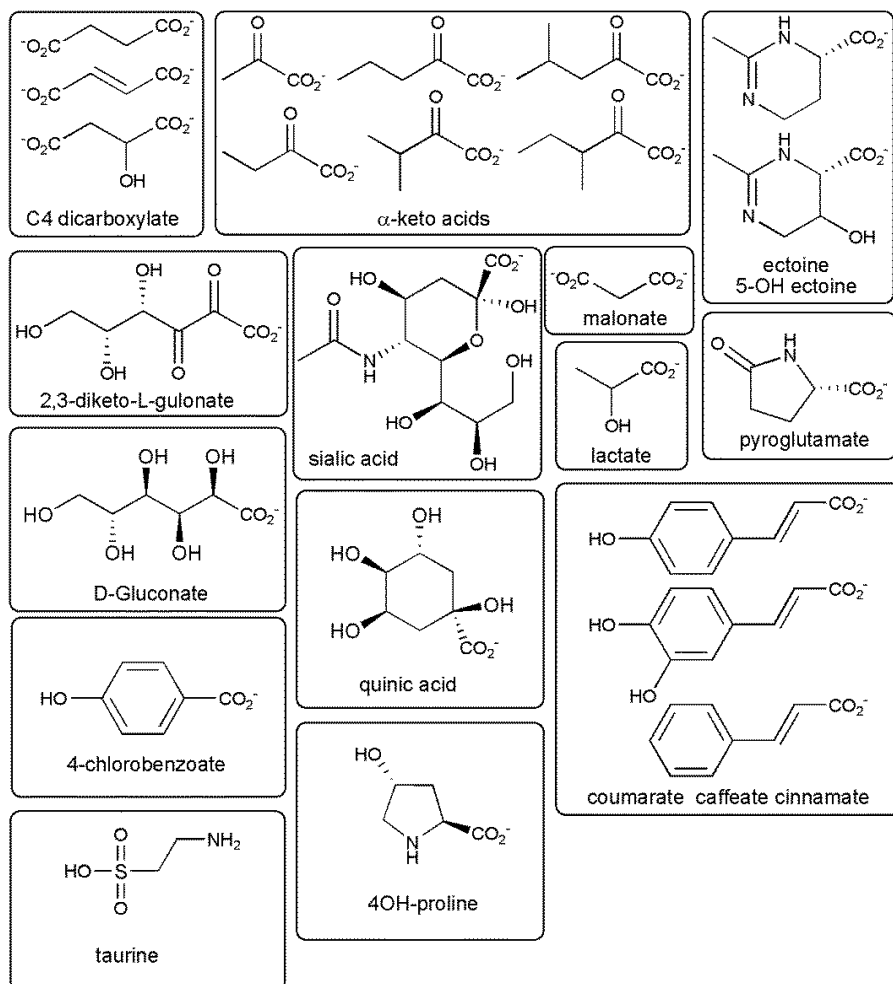

**Figure S1**

**Schematic of the previously determined ligands of TRAP SBPs.**

These ligands map to specific clusters within the  $10^{-120}$  TRAP SBP SSN. C4-dicarboxylates (cluster 10, 74),  $\alpha$ -keto acids (2), ectoine/5-OH ectoine (13), 2,3-diketo-L-gulonate (11), sialic acid (48,64), malonate (17), lactate (220), pyroglutamate (31,166), D-gluconate (43), quinic acid (100), coumarate/caffeate/cinnamate (28), 4-chlorobenzoate (475), taurine (78), 4OH-proline (61).

**Table S2** Mapping of ligand, cluster number and their associated colors within the E<sup>-120</sup> SSN (Figure 3)

| Node Color      | Ligand(s)                                    | Cluster #s in the 10 <sup>-120</sup> SSN |
|-----------------|----------------------------------------------|------------------------------------------|
| navy            | (S)-2-acetolactate                           | 1, 12, 1672                              |
| lightskyblue    | α-keto acids                                 | 2, 191                                   |
| palegreen       | 4-carbon diacids                             | 3, 9, 10, 74                             |
| sandybrown      | D-galacturonate/D-glucuronate                | 4, 44, 47, 65, 186, 310, 319, 452, 790   |
| deepskyblue     | D-glucuronate                                | 5, 30, 161, 585                          |
| magenta         | 2,3-diketo-L-gulonate                        | 11                                       |
| cyan            | ectoine, 5-hydroxyectoine                    | 13, 254, 389, 1038                       |
| peru            | pyruvate                                     | 15                                       |
| indigo          | malonate                                     | 17, 35                                   |
| olive           | phenolic acids                               | 21, 28, 139, 180, 279, 429, 1675         |
| darksalmon      | 5/6-carbon aldonic acids                     | 27, 545                                  |
| yellow          | pyroglutamate                                | 31, 124, 126, 166, 190, 946              |
| pink            | ethanolamine                                 | 33                                       |
| green           | 6-carbon aldonic acids                       | 43, 297                                  |
| honeydew        | -                                            | 45                                       |
| blue            | sialic acid                                  | 48, 64                                   |
| olivedrab       | L-fuconate/L-galactonate                     | 49, 197, 403                             |
| metallic bronze | non-specific sugar acids                     | 50                                       |
| plum            | trans-4-hydroxy-L-proline                    | 61                                       |
| orange          | taurine                                      | 78                                       |
| deep teal       | glycerol-3-phosphate                         | 87, 244                                  |
| deep fir        | L-guluronate/L-galacturonate                 | 95, 323                                  |
| teal            | D-mannonate/L-gulonate                       | 97, 223                                  |
| lightcyan       | (R)-pantoate                                 | 98                                       |
| slateblue       | D-quinic acid                                | 100                                      |
| firebrick       | D-alanyl-D-alanine                           | 104, 541                                 |
| black           | 3-deoxy-D-manno-oct-2-ulosonic acid          | 107                                      |
| burlywood       | D-erythronate                                | 123, 219                                 |
| wheat           | (putative) lactic acid                       | 147                                      |
| lightcoral      | orotate/dihydrooroate                        | 153                                      |
| slategray       | indole 3-pyruvate/indole 3-acetate           | 171, 588, 1677                           |
| crimson         | D-mannuronate                                | 214, 472                                 |
| fandango        | L-erythronate                                | 217                                      |
| lime            | L-lactate                                    | 220                                      |
| silver          | D-taluronate/D-mannuronate                   | 267                                      |
| dove grey       | diglycerol phosphate                         | 277                                      |
| lightseagreen   | mandelate                                    | 350, 582                                 |
| beige           | (putative) suberate                          | 426                                      |
| hotpink         | 4-chlorobenzoate                             | 475                                      |
| cadetblue       | benzoylformate                               | 614                                      |
| paleturquoise   | (putative) D-ribonate                        | 618                                      |
| eggplant        | L-ribonate/D-talonate                        | 1646                                     |
| royalblue       | (putative) D-glycerate                       | 1688                                     |
| palevioletred   | (putative) hydroxylated aromatic carboxylate | 1690                                     |

| <b>Table S3 Number of sequences that map to the 71 clusters for which ligands were determined in this study</b> |                               |                       |                  |                                     |                       |
|-----------------------------------------------------------------------------------------------------------------|-------------------------------|-----------------------|------------------|-------------------------------------|-----------------------|
| <b>Cluster #</b>                                                                                                | <b>Ligand</b>                 | <b># of sequences</b> | <b>Cluster #</b> | <b>Ligand</b>                       | <b># of sequences</b> |
| 1                                                                                                               | (S)-2-acetolactate            | 142                   | 33               | ethanolamine                        | 68                    |
| 12                                                                                                              | (S)-2-acetolactate            | 83                    | 297              | 6-carbon aldonic acids              | 3                     |
| 1672                                                                                                            | (S)-2-acetolactate            | 1                     | 49               | L-fuconate/L-galactonate            | 152                   |
| 191                                                                                                             | $\alpha$ -keto acids          | 12                    | 197              | L-fuconate/L-galactonate            | 5                     |
| 3                                                                                                               | 4-carbon diacids              | 226                   | 403              | L-fuconate/L-galactonate            | 2                     |
| 9                                                                                                               | 4-carbon diacids              | 30                    | 50               | non-specific sugar acids            | 64                    |
| 4                                                                                                               | D-galacturonate/D-glucuronate | 70                    | 87               | glycerol-3-phosphate                | 32                    |
| 30                                                                                                              | D-galacturonate/D-glucuronate | 164                   | 244              | glycerol-3-phosphate                | 6                     |
| 44                                                                                                              | D-galacturonate/D-glucuronate | 149                   | 95               | L-gulonate/L-galacturonate          | 18                    |
| 47                                                                                                              | D-galacturonate/D-glucuronate | 67                    | 323              | L-gulonate/L-galacturonate          | 3                     |
| 65                                                                                                              | D-galacturonate/D-glucuronate | 35                    | 97               | D-mannonate/L-gulonate              | 9                     |
| 186                                                                                                             | D-galacturonate/D-glucuronate | 5                     | 223              | D-mannonate/L-gulonate              | 11                    |
| 310                                                                                                             | D-galacturonate/D-glucuronate | 4                     | 98               | (R)-pantoate                        | 21                    |
| 319                                                                                                             | D-galacturonate/D-glucuronate | 3                     | 104              | D-alanyl-D-alanine                  | 29                    |
| 452                                                                                                             | D-galacturonate/D-glucuronate | 2                     | 541              | D-alanyl-D-alanine                  | 2                     |
| 290                                                                                                             | D-galacturonate/D-glucuronate | 3                     | 107              | 3-deoxy-D-manno-oct-2-ulosonic acid | 16                    |
| 5                                                                                                               | D-glucuronate                 | 74                    | 123              | D-erythronate                       | 12                    |
| 161                                                                                                             | D-glucuronate                 | 8                     | 219              | D-erythronate                       | 6                     |
| 585                                                                                                             | D-glucuronate                 | 2                     | 147              | lactic acid                         | 8                     |
| 254                                                                                                             | ectoine, 5-hydroxyectoine     | 5                     | 153              | orotate/dihydrooroate               | 6                     |
| 389                                                                                                             | ectoine, 5-hydroxyectoine     | 2                     | 171              | indole 3-pyruvate/indole 3-acetate  | 4                     |
| 1038                                                                                                            | ectoine, 5-hydroxyectoine     | 1                     | 588              | indole 3-pyruvate/indole 3-acetate  | 2                     |
| 15                                                                                                              | pyruvate                      | 322                   | 1677             | indole 3-pyruvate/indole 3-acetate  | 1                     |
| 21                                                                                                              | phenolic acids                | 35                    | 214              | D-mannuronate                       | 7                     |
| 139                                                                                                             | phenolic acids                | 8                     | 472              | D-mannuronate                       | 2                     |
| 180                                                                                                             | phenolic acids                | 5                     | 217              | L-erythronate                       | 4                     |
| 279                                                                                                             | phenolic acids                | 5                     | 267              | D-taluronate/D-mannuronate          | 4                     |
| 429                                                                                                             | phenolic acids                | 2                     | 277              | diglycerol phosphate                | 4                     |
| 1675                                                                                                            | phenolic acids                | 1                     | 350              | mandelate                           | 9                     |
| 27                                                                                                              | 5/6-carbon aldonic acids      | 62                    | 582              | mandelate                           | 2                     |
| 545                                                                                                             | 5/6-carbon aldonic acids      | 2                     | 426              | suberate                            | 2                     |
| 124                                                                                                             | pyroglutamate                 | 11                    | 614              | benzoylformate                      | 2                     |
| 126                                                                                                             | pyroglutamate                 | 12                    | 618              | D-ribonate                          | 2                     |
| 190                                                                                                             | pyroglutamate                 | 8                     | 1646             | L-ribonate/D-talonate               | 1                     |
| 946                                                                                                             | pyroglutamate                 | 2                     | 1688             | D-glycerate                         | 1                     |
|                                                                                                                 |                               |                       | 1690             | phenolic acids                      | 1                     |

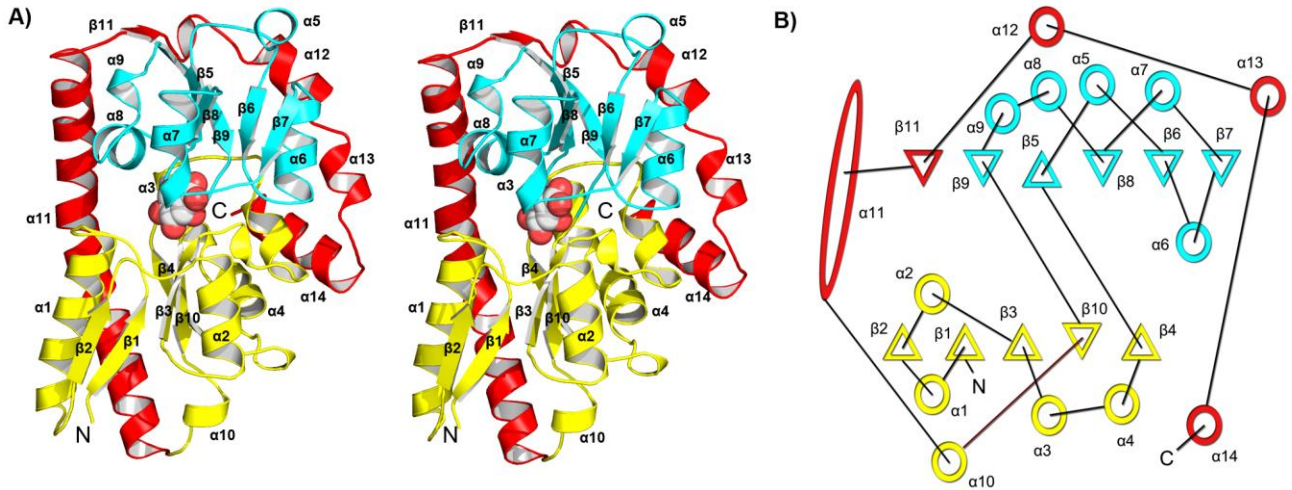

**Figure S2**

**TRAP SBP FOLD.**

**A)** Stereo ribbon diagram of Bamb\_6123 from *Burkholderia ambifaria* with bound D-galacturonate (PDBID=4N17). TRAP SBPs are composed of two domains, domain 1 (shown in yellow) and domain 2 (shown in cyan), and a four helix  $\alpha$ -helical wrapper (shown in red). **B)** Schematic of the TRAP SBP fold. Strands are shown as circles and  $\alpha$ -helices are shown as triangles.

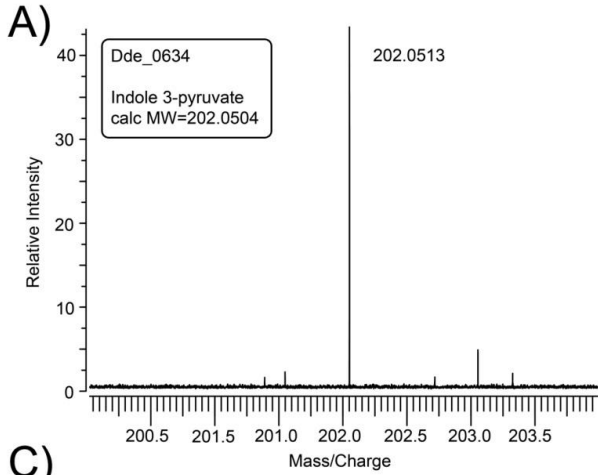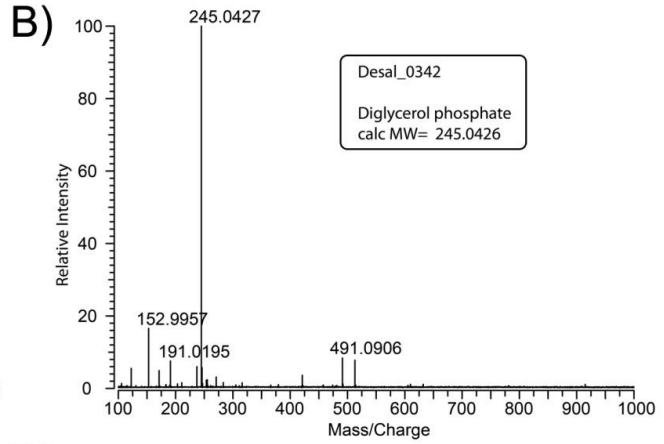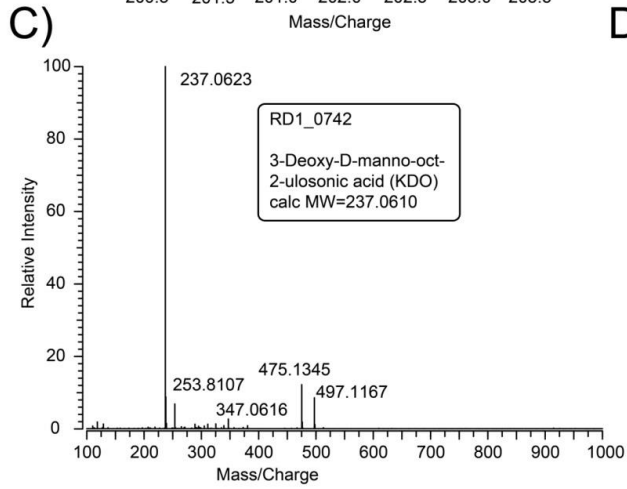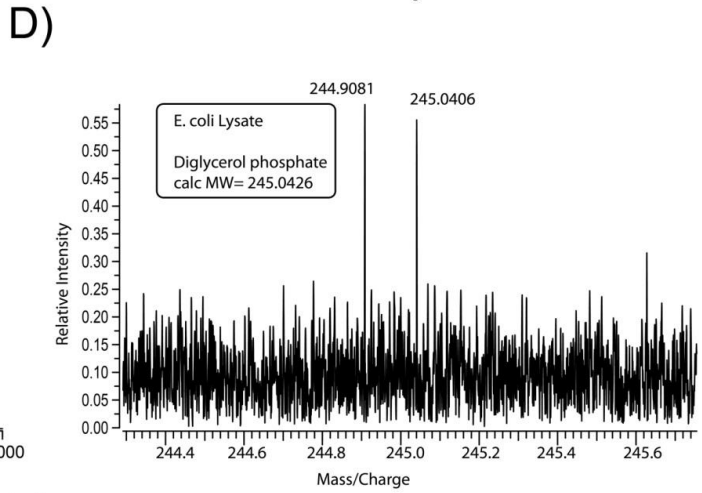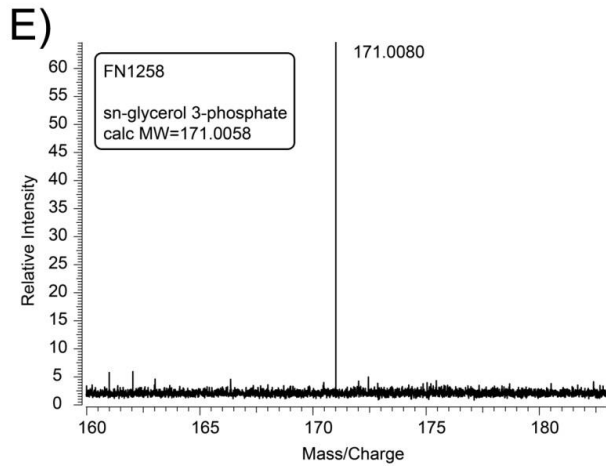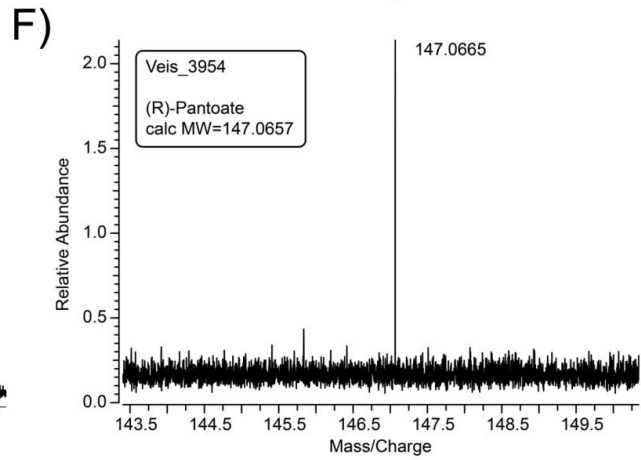

## Figure S3

### X-FTMS of TRAP Ligands.

In **panels A-C** and **E-F** free ligands were separated from the TRAP SBP by methanol extraction. All proteins were expressed in *E. coli* and purified by metal affinity and size exclusion chromatography. In **panel D**, cellular extracts of *E. coli* (no expression plasmid) were methanol extracted to obtain a small molecule metabolome sample for X-FTMS analysis. X-FTMS peaks for **A**) indole 3-pyruvate extracted from Dde\_0634, **B**) diglycerol phosphate extracted from Desal\_0342, **C**) 3-deoxy-D-manno-oct-2-ulosonic acid (KDO) extracted from RD1\_0742, **D**) diglycerol phosphate extracted from *E. coli* whole cells, **E**) sn-glycerol 3-phosphate extracted from FN1258 and **F**) (R)-pantoate extracted from Veis\_3954.



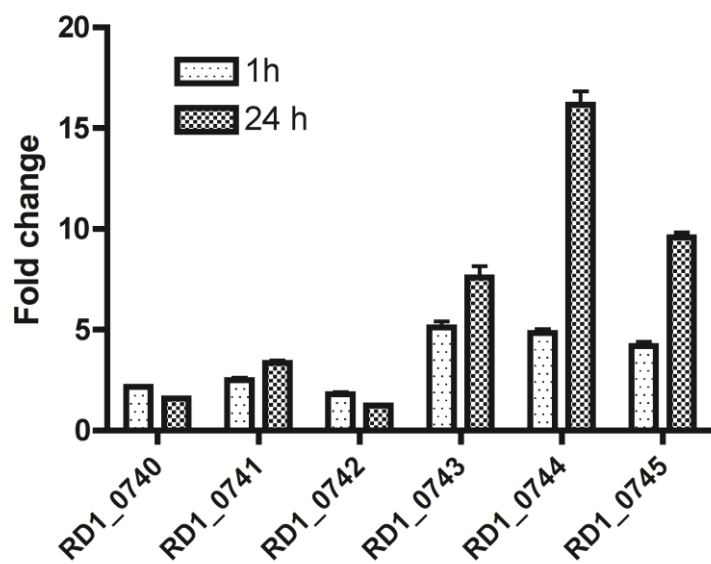

Fig: qRT-PCR for the RD1\_0742 neighborhood, 1h and 24 h after inoculation. KDO vs Glucose .

#### Figure S4

qRT-PCR transcriptional analysis of the up-regulation (fold change in expression) of the KDO TRAP transporter (RD1\_0742) and related catabolic genes during incubation of *R. denitrificans* with KDO versus glucose at 1 hr and 24 hr. While these genes are upregulated in the presence of KDO *R. denitrificans* was not able to utilize KDO as a carbon source.

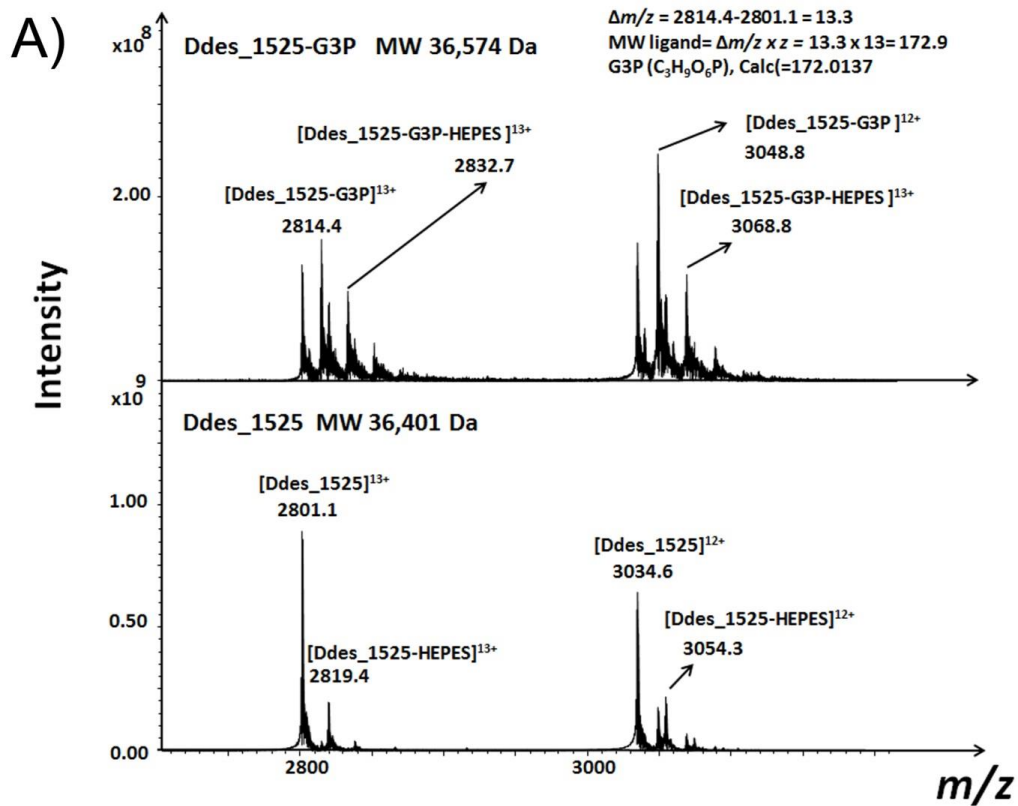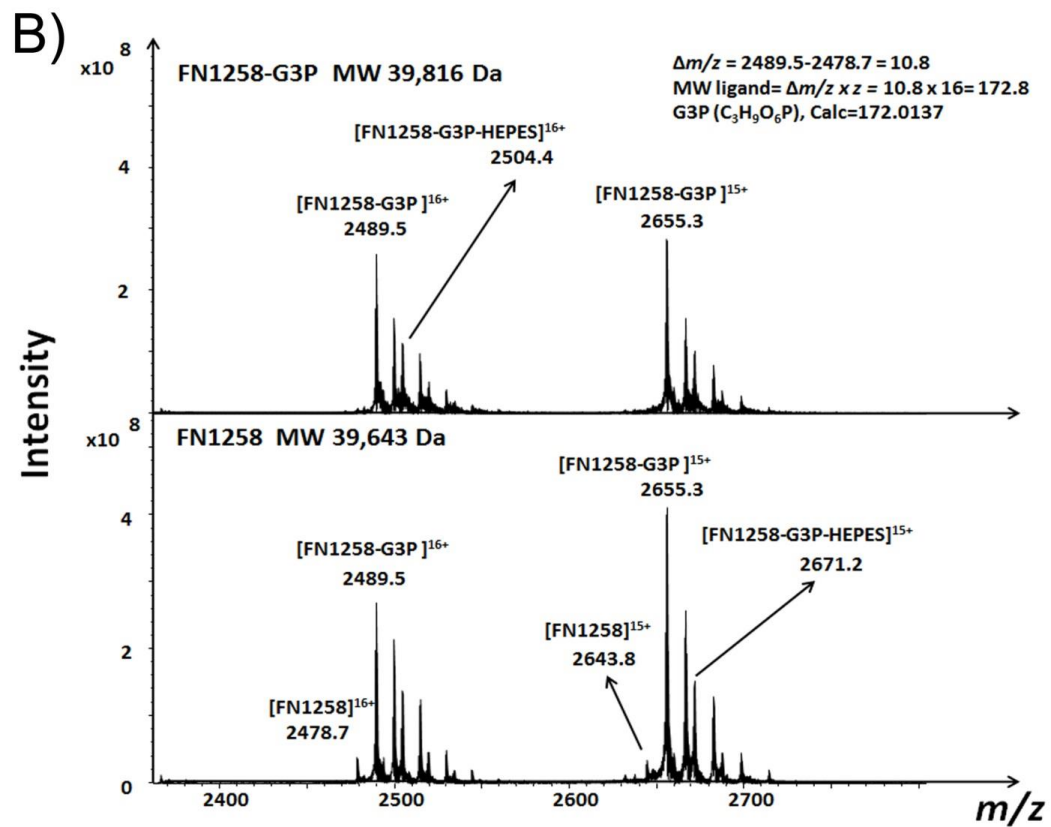

C)

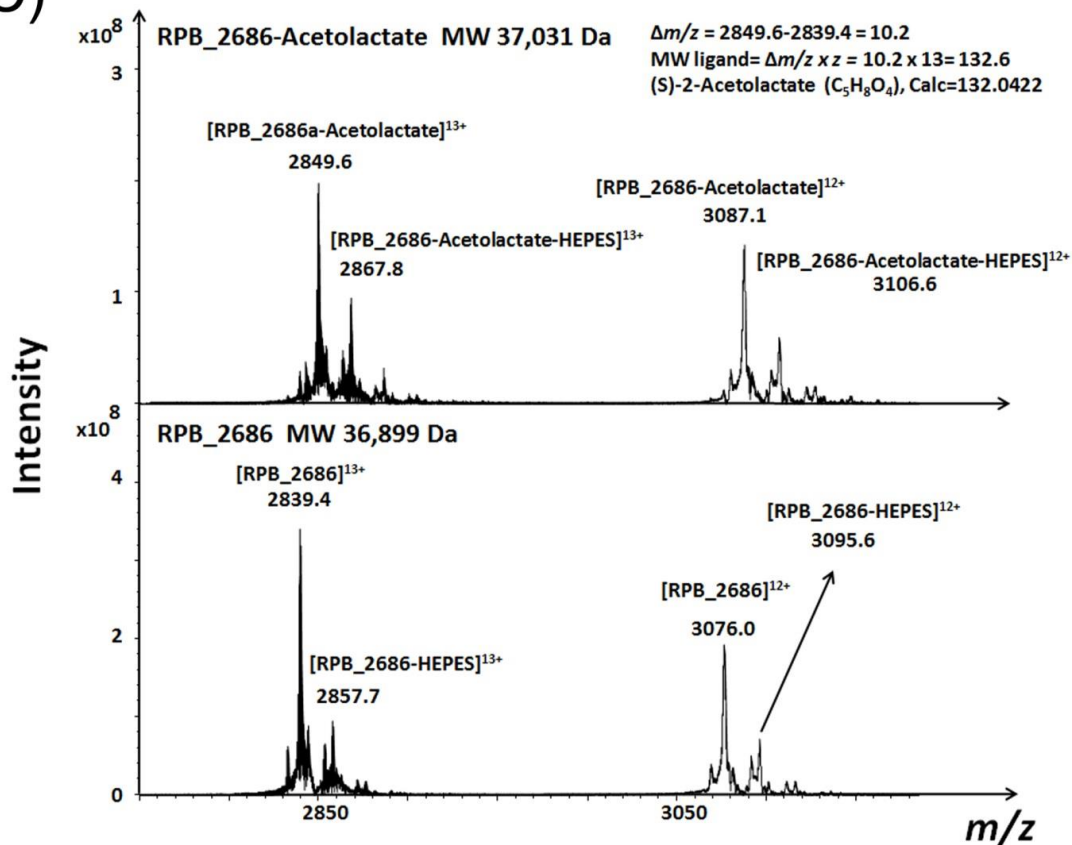

D)

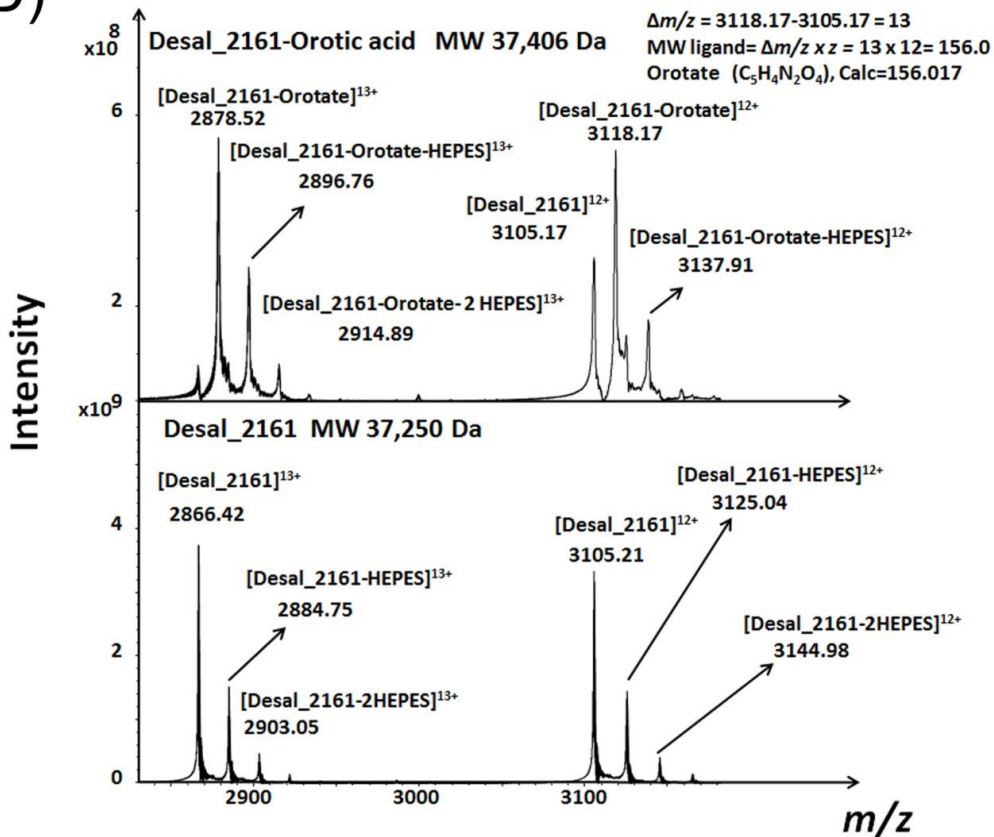

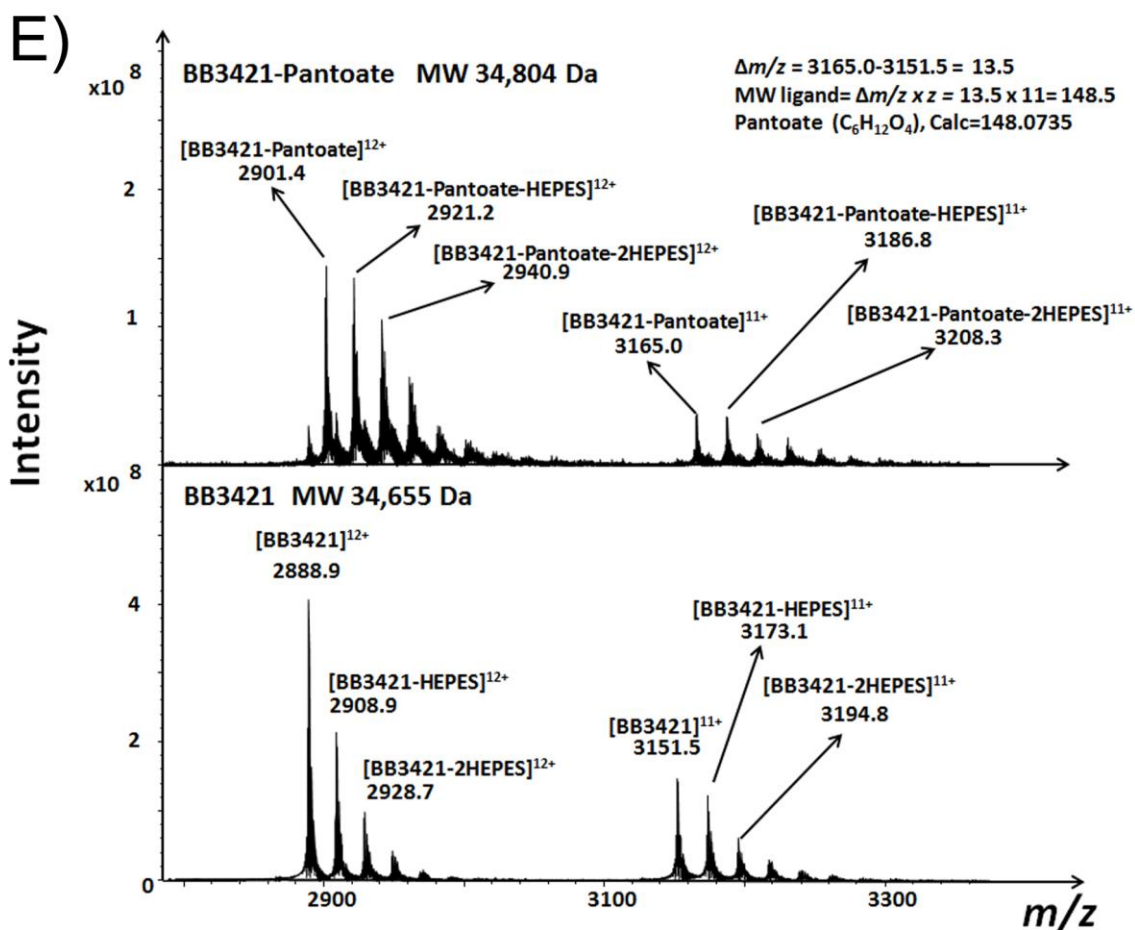

**Figure S5**

**ESI-FTMS of Copurified Ligand TRAP SBP Complexes.**

All experiments were performed on a Bruker Solarix 12 Tesla ESI-FTMS. Mass spectra were recorded in the positive ion mode from 50 to 6000  $m/z$ . Each spectrum was an average of 32 scans. The  $\Delta m/z$  for the unbound protein and the protein:ligand complex ions was multiplied by the charge state ( $z$ ) to directly afford the MW of the bound ligand, using the following equation: MW ligand =  $\Delta m/z \times z$ . **A)** Ddes\_1525 sn-glycerol phosphate complex. **B)** FN1258 sn-glycerol phosphate complex. **C)** RPB\_2686 (S)-2-Acetolactate complex. **D)** Desal\_2161 orotic acid complex. **E)** BB3421 (R)-pantoate complex.

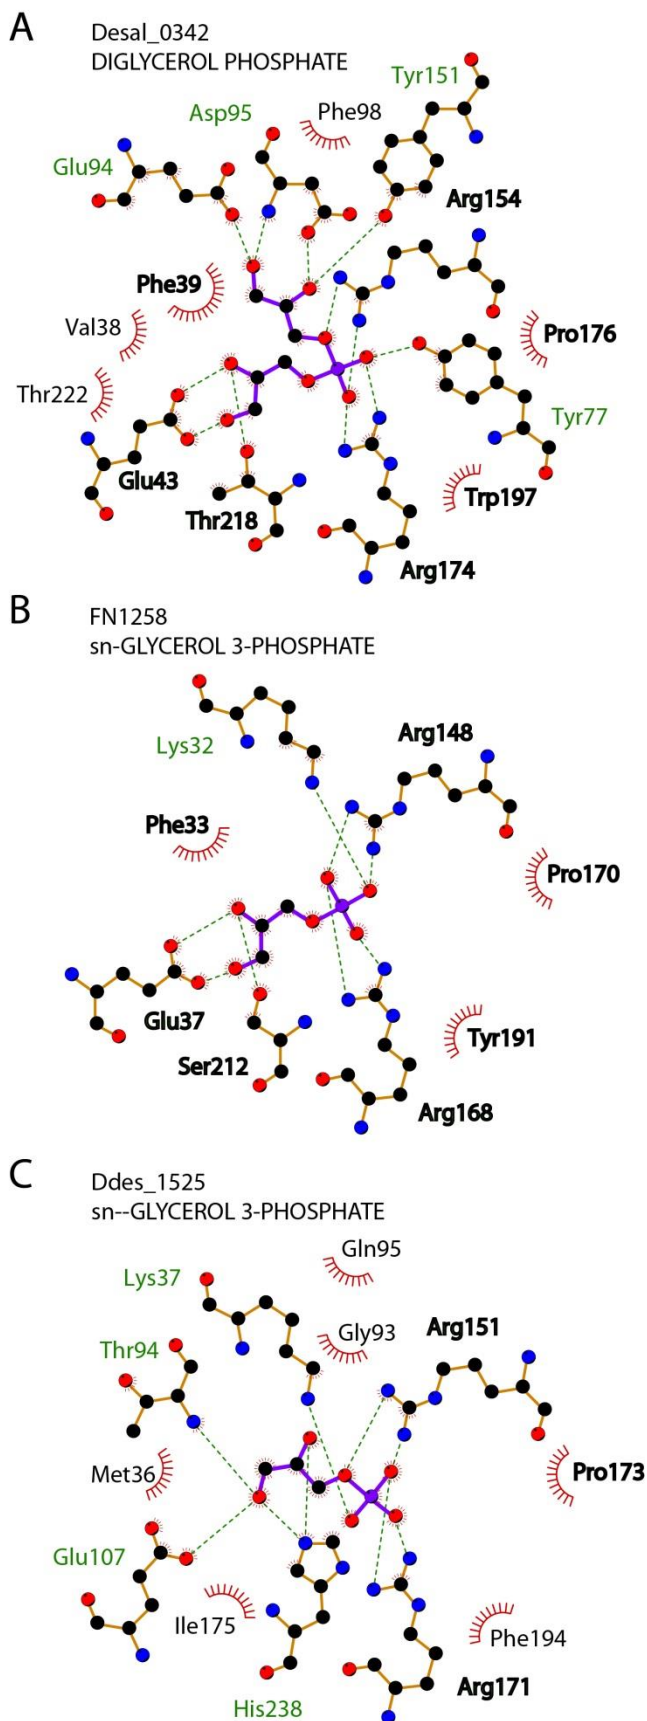

**Figure S6**

**Interactions of TRAP SBPs with glycerol phosphates**

**A)** Desal\_0342 diglycerol phosphate complex. **B)** FN1258 sn-glycerol phosphate complex. **C)** Ddes\_1525 sn-glycerol 3-phosphate complex. Residues that are similarly positioned between Desal\_0342 and FN1258 are shown in BOLD. Residues of Ddes\_1525 that are similarly positioned and make similar interactions to FN1258 are shown BOLD. Lys32 of FN1258 and Lys37 of Ddes\_1525 do not superimpose.

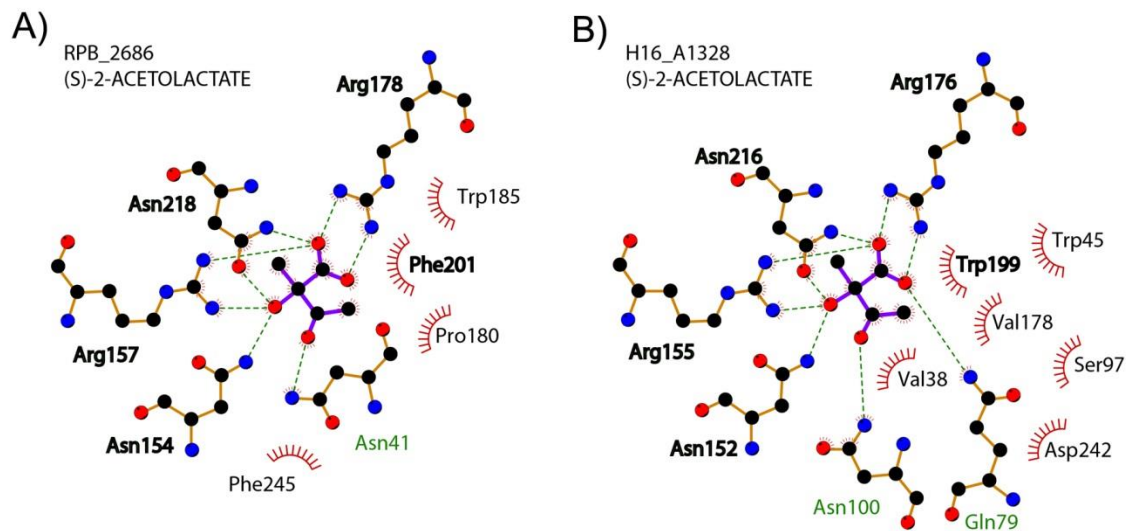

**Figure S7**

**Interactions of TRAP SBPs with (S)-2-Acetolactate**

Interactions of **A)** RPB\_2686 and **B)** H16\_A1328 with (S)-2-Acetolactate. Despite low homology RPB\_2686 and H16\_A1328 coordinate (S)-2-Acetolactate in similar fashions. Residues that are similarly positioned and make similar interactions between Desal\_0342 and FN1258 are shown in BOLD. The structurally conserved interactions are two arginines (Arg178, Arg157, RPB\_2686 numbering) and two asparagines (Asn154, Asn218) that coordinate the alpha-hydroxy acid group with six hydrogen bonds, while a non-positionally conserved asparagine (Asn41, RPB\_2686 or Asn 100, H16\_A1328) coordinates the keto group. H16\_A1328 has an additional hydrogen bond between Gln79 (H16\_A1328 numbering) and the carboxylate of 2-acetolactate that is not observed in RPB\_2686.

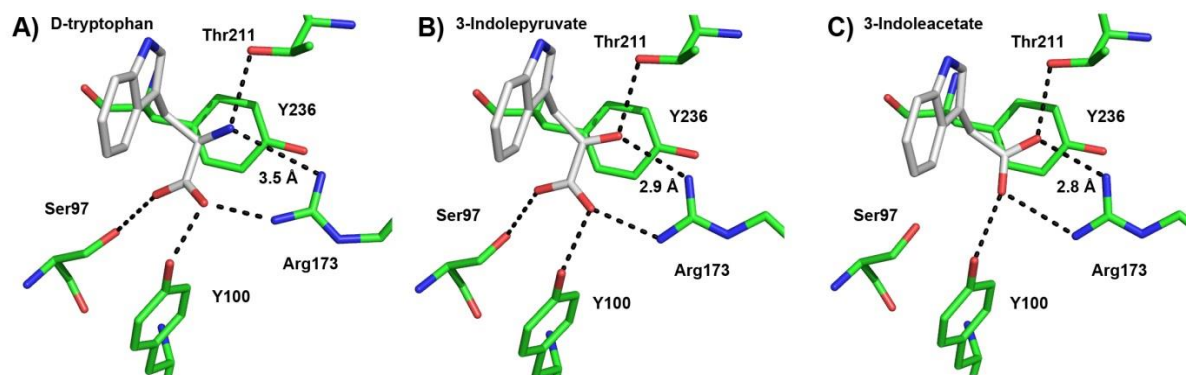

**Figure S8.**

**Interactions of the TRAP SBP Dde\_0634 with indole acids.**

Interactions of **A)** D-tryptophan **B)** 3-Indolepyruvate and **C)** 3-indole acetate with Dde\_0634 from *Desulfovibrio alaskensis*. Extensive hydrophobic and polar interactions between the protein and the indole moiety are not shown for clarity. Of note, the D-Trp and 3-IPA complexes are the only TRAP-SBP structures determined in this study where the carboxylate does not participate in two hydrogen bonds with the conserved arginine. Instead the keto acid group/peptide backbone is rotated 90 degrees, with one carboxylate oxygen making a bifurcated hydrogen bond with R173NH<sub>2</sub> and Tyr100OH and the other hydrogen bonded to Ser97OG. In contrast, the structure of the IAA complex (2.25 Å) displayed the more classic two hydrogen bonds between the carboxylate and the conserved arginine.



**A)**

| <b>Agrobacterium tumefaciens C58</b> | <b>C-source</b> | <b>N-source</b> |
|--------------------------------------|-----------------|-----------------|
| Glucose                              | +++             |                 |
| NH <sub>4</sub> Cl                   |                 | +++             |
| Ethanolamine                         | -               | ++              |
| Glycine                              | -               | +++             |
| L-glutamate                          | +++             | +++             |

| <b>Chromohalobacter salexigens DSM3043</b> | <b>C-source</b> | <b>N-source</b> |
|--------------------------------------------|-----------------|-----------------|
| Glucose                                    | +++             |                 |
| NH <sub>4</sub> Cl                         |                 | +++             |
| Ethanolamine                               | -               | +               |
| Glycine                                    | -               | ++              |
| L-glutamate                                | +++             | +++             |

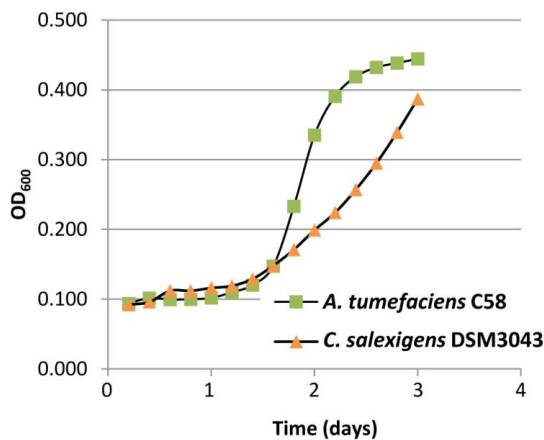

**B)**

| <b>Function/annotation</b>       | <b>Locus tag</b> | <b>Fold change</b> |
|----------------------------------|------------------|--------------------|
| TRAP transporter                 | Csal_0676        | 80-fold            |
|                                  | Csal_0677        | 60-fold            |
|                                  | Csal_0678        | 10-fold            |
| Glutamine synthetase             | Csal_0679        | 15-fold            |
| Alcohol dehydrogenase            | Csal_0681        | 50-fold            |
| Aldehyde dehydrogenase           | Csal_0680        | 45-fold            |
| N-formylglutamate amidohydrolase | Csal_0675        | 125-fold           |

**C)**

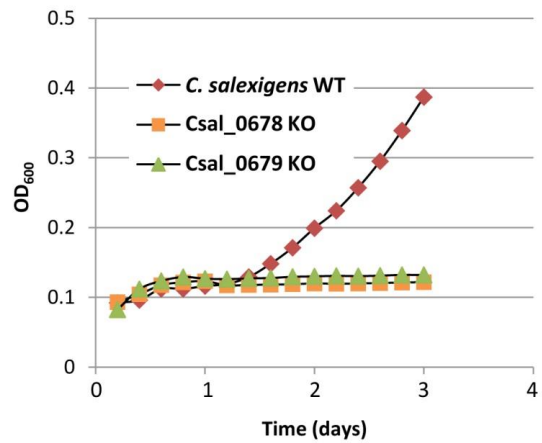



**Figure S9.**

**Analysis of growth of *A. tumefaciens* C58 and *C. salexigens* on ethanolamine.**

**A)** Growth characteristics of *A. tumefaciens* and *C. salexigens* with  $\text{NH}_4\text{Cl}$ , ethanolamine, glycine, or L-glutamate (20 mM) as the sole source of nitrogen during aerobic growth. *A. tumefaciens* and *C. salexigens* were unable to utilize ethanolamine or glycine as a carbon source. Growth rate of *A. tumefaciens* (green squares) and *C. salexigens* (orange triangles) with ethanolamine as the sole source of nitrogen. **B)** qRT-PCR transcriptional analysis of the up-regulation (fold change in expression) of the ethanolamine TRAP transporter and related catabolic genes during growth of *C. salexigens* on ethanolamine, relative to growth with  $\text{NH}_4\text{Cl}$ , as the sole source of nitrogen. Fold changes are the averages of at least three biological replicates. **C)** Growth of *C. salexigens* strains with genetic disruptions in the TRAP SBP (*CsaI\_0678* KO, orange squares) or glutamine synthetase (*CsaI\_0679* KO, green triangles) on ethanolamine as the sole nitrogen source. *C. salexigens* WT is shown for comparison (red diamonds).

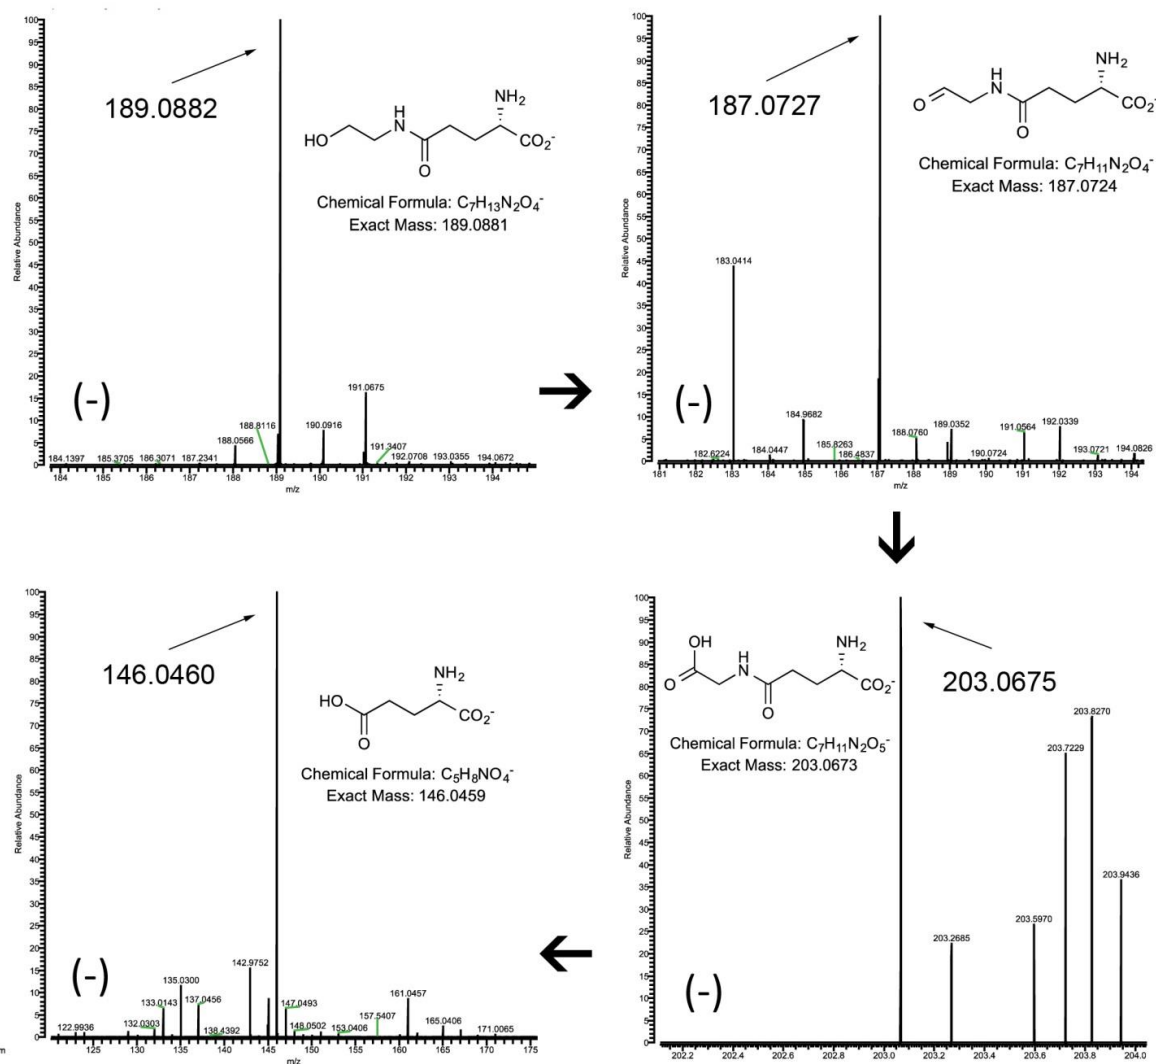

**Figure S10.**

**LC-FTMS  $m/z$  peaks for ethanolamine utilization pathway intermediates and products.**

Intermediates in ethanolamine metabolism detected in cell extracts of *A. tumefaciens* after feeding with 20 mM ethanolamine (shown,  $t=30$  min), analyzed by LC-FTMS in negative (-) ion mode. The mass of each detected metabolite was within  $\pm 0.0003$  Da of the exact mass.
